# Supplementary material
Source: MDPI journal article supplement (https://www.mdpi.com/2413-8851/7/4/123)
Supplement: s1 [file s1]

# Spatial Analysis of Risk Exposure of Urban Trees: A Case Study from Bologna (Italy)

Laura Caggiu \*, Federico Fiorani, Elisa Corradini, Enrico Felice and Alberto Minelli

Department of Agricultural and Food Sciences, University of Bologna, 40127 Bologna, Italy

## SUPPLEMENTARY MATERIAL

**Supplementary Table S1.** Pearson correlation matrix

|                        | <b>DN value</b> | <b>Buildings</b> | <b>Street</b> | <b>Walking and cycle path</b> |
|------------------------|-----------------|------------------|---------------|-------------------------------|
| DN value               | 1               | -                | -             | -                             |
| Buildings              | 0.62 *          | 1                | -             | -                             |
| Street                 | 0.68 *          | 0.97 *           | 1             | -                             |
| Walking and cycle path | 0.62 *          | 0.98 *           | 0.99 *        | 1                             |

\* Statistical significance at an alpha level of 0.05.

**Supplementary Table S2.** Analysis of variance.

|               | <b>DF</b> | <b>Sum of squares</b> | <b>Mean squared</b> | <b>F-value</b> | <b>Pr&gt;F</b> |
|---------------|-----------|-----------------------|---------------------|----------------|----------------|
| Model         | 3         | 363905.00             | 121302.00           | 88.04          | <0.0001        |
| Error         | 192       | 264524.00             | 1377.73             |                |                |
| Correct total | 195       | 628429.00             |                     |                |                |
